# Supplementary material
Source: Springer Nature journal article supplement (https://www.springermedizin.de/resource/supplementary/12889_2008_1437_MOESM2_ESM.pdf/9503866)

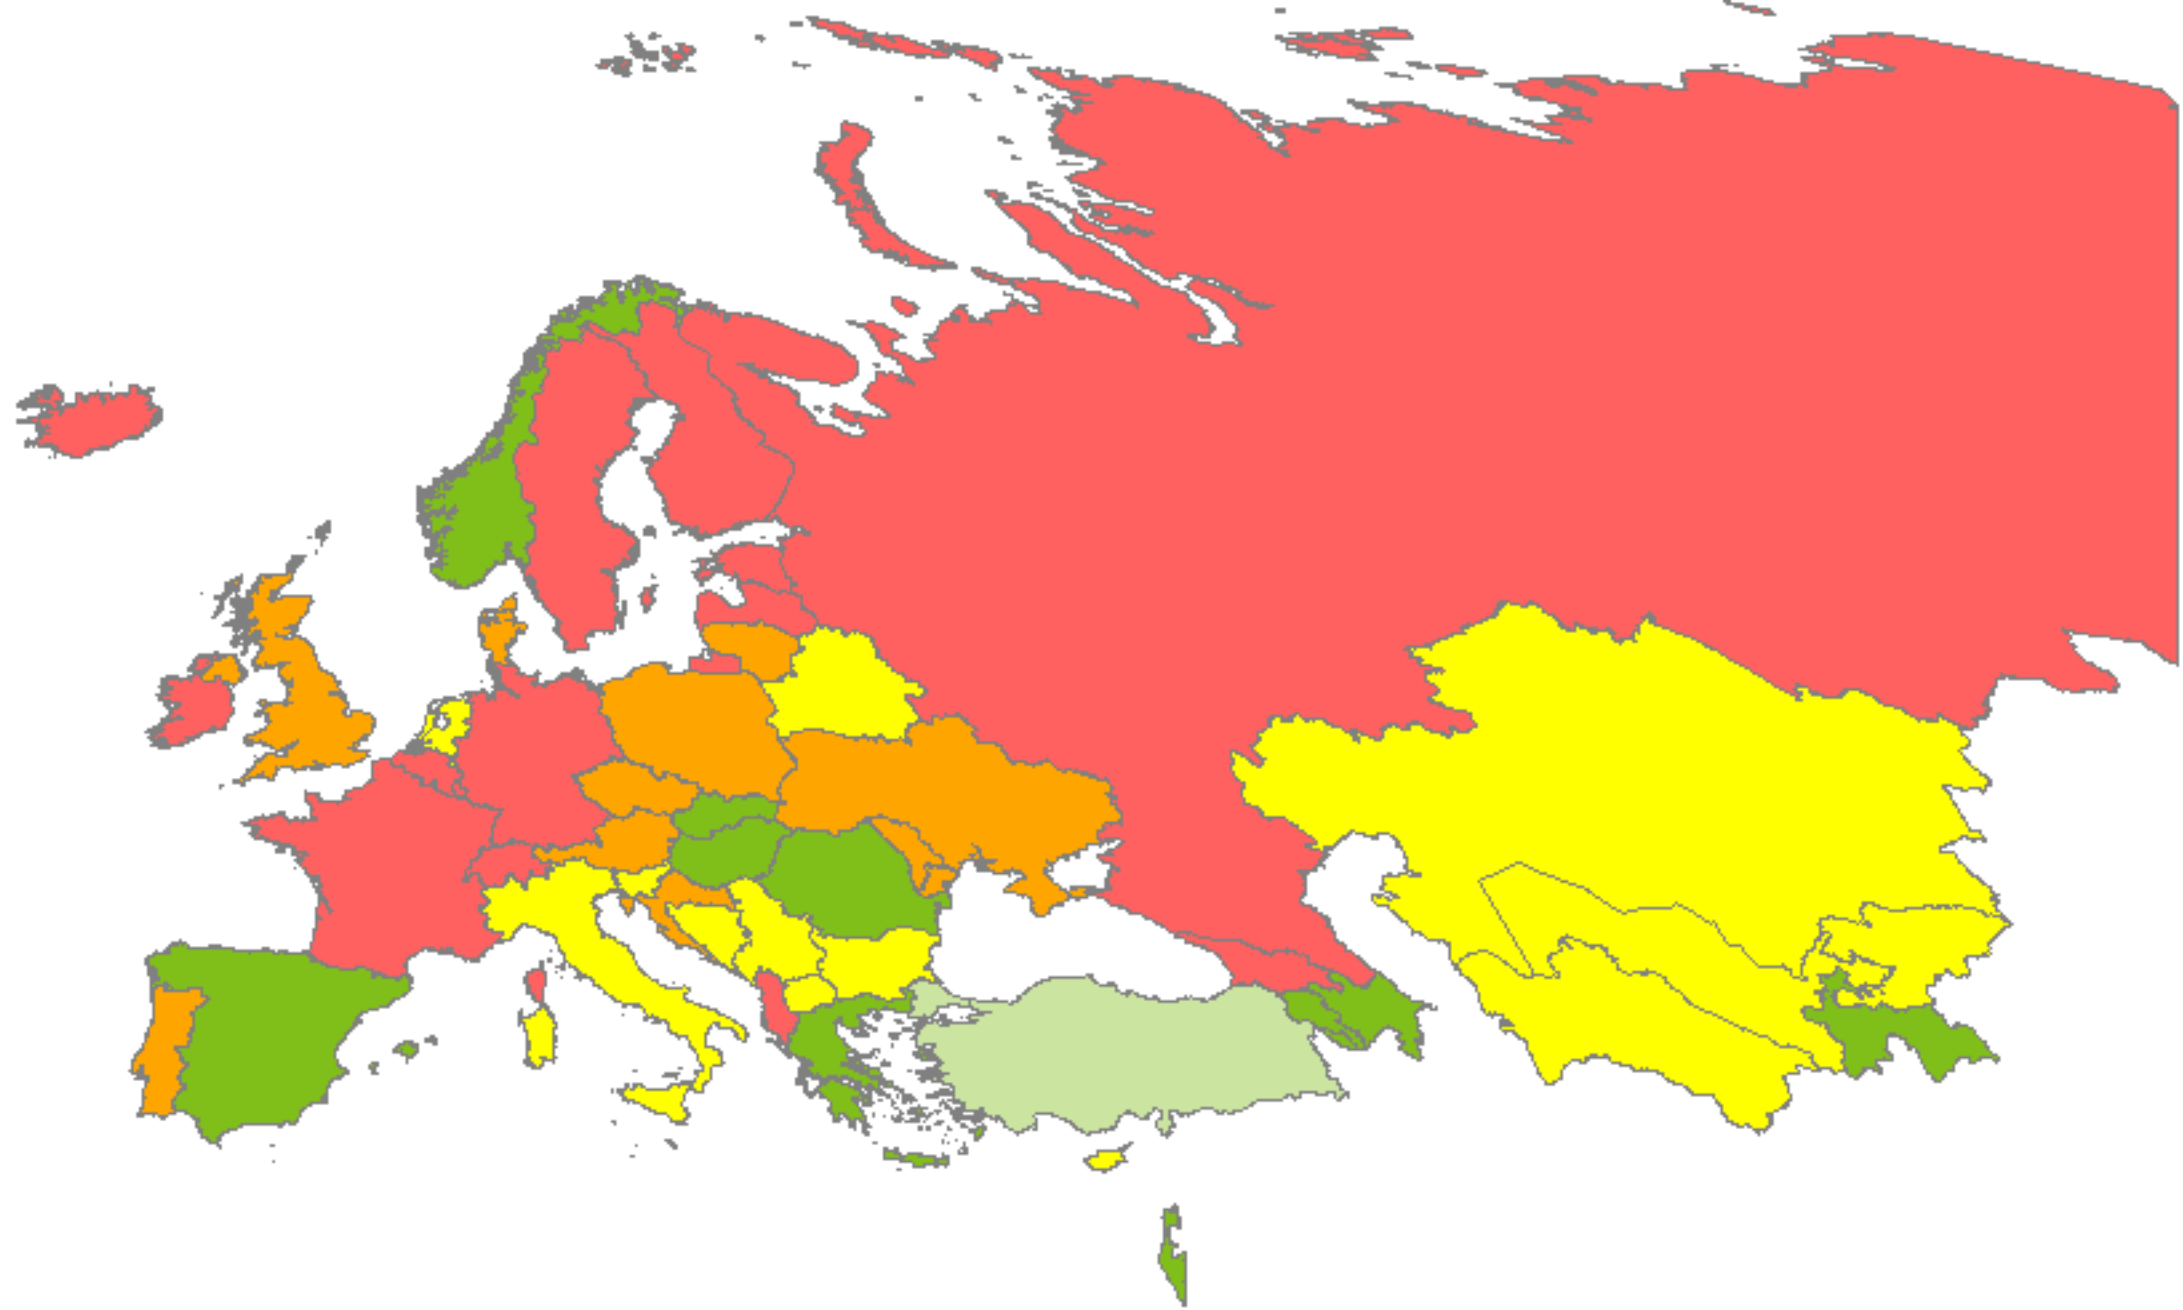

Incidence (Cases per 100 000):

|                                                                                             |                                                                                               |                                                                                               |                                                                                               |                                                                                             |
|---------------------------------------------------------------------------------------------|-----------------------------------------------------------------------------------------------|-----------------------------------------------------------------------------------------------|-----------------------------------------------------------------------------------------------|---------------------------------------------------------------------------------------------|
|  no data |  $\leq 1$ |  1 - 2.5 |  2.5 - 7 |  $> 7$ |
|---------------------------------------------------------------------------------------------|-----------------------------------------------------------------------------------------------|-----------------------------------------------------------------------------------------------|-----------------------------------------------------------------------------------------------|---------------------------------------------------------------------------------------------|

Supplement: MOESM2 [file 9503866]
